2. Eger, E. I., Saidman, L. J., and Brandstater, B.: Minimum alveolar anesthetic concentration: A standard of anesthetic potency, *ANESTHESIOLOGY* 26: 756, 1965.
3. Brooks, C. McC., and Eccles, J. C.: The study of the effects of anaesthesia and asphyxia on the monosynaptic pathway through the spinal cord, *J. Neurophysiol.* 10: 349, 1947.
4. Austin, G. M., and Pask, E. A.: Effect of ether inhalation upon spinal cord and root action potentials, *J. Physiol.* 118: 405, 1952.
5. Somjen, G.: Effect of anesthetics on spinal cord of mammals, *ANESTHESIOLOGY* 28: 135, 1967.
6. de Jong, R. H., Freund, F. G., Robles, R., and Morikawa, K. I.: Anesthetic potency determined by depression of synaptic transmission, *ANESTHESIOLOGY* 29: 1139, 1968.
7. Magladery, J. W., Porter, W. E., Park, A. M., and Teasdall, R. D.: Electrophysiological studies of nerve and reflex activity in normal man. IV. The two neurone reflex and identification of certain action potentials from spinal roots and cord, *Bull. Johns Hopkins Hosp.* 88: 499, 1951.
8. Mayer, R. F., and Mawdsley, C.: Studies in man and cat of the significance of the H wave, *J. Neurol. Neurosurg. Psychiat.* 28: 201, 1965.
9. Cook, W. A.: Effects of low frequency stimulation on the monosynaptic reflex (H-reflex) in man, *Neurology* 18: 47, 1968.
10. Saidman, L. J., and Eger, E. I.: Effect of nitrous oxide and of narcotic premedication on the alveolar concentration of halothane required for anesthesia, *ANESTHESIOLOGY* 25: 302, 1964.
11. Saidman, L. J., Eger, E. I., Munson, E. S., Babad, A. A., and Muallem, M.: Minimum alveolar concentration of methoxyflurane, halothane, ether and cyclopropane in man: Correlation with theories of anesthesia, *ANESTHESIOLOGY* 28: 994, 1967.
12. de Jong, R. H., Hershey, W. N., and Wagman, I. H.: Measurement of a spinal reflex response (H-reflex) during general anesthesia in man, *ANESTHESIOLOGY* 28: 382, 1967.
13. Eisele, J. H., Eger, E. I., and Muallem, M.: Narcotic properties of carbon dioxide in the dog, *ANESTHESIOLOGY* 28: 856, 1967.
14. Paillard, J.: Functional organization of afferent innervation of muscle studied in man by monosynaptic testing, *Amer. J. Phys. Med.* 38: 239, 1959.

---

## Muscle

**MYASTHENIC SYNDROME** In a series of 40 patients with the clinical and electromyographic features of the myasthenic syndrome, studied over the past 18 years, 70 per cent had malignant neoplasms at the time of their first examinations or subsequently. The myasthenic syndrome associated with bronchogenic carcinoma is rare. A possible cause for the syndrome was not evident among 12 patients (30 per cent) in whom no tumor was found. In patients with the myasthenic syndrome, resting muscle shows a pronounced depression of the response to a single supra-maximal stimulus applied to the motor nerve. At low rates of stimulation there may be a further transient decrease of the response but, with repetitive stimulation at rates above 10 sec, there is a marked increase in the response. These patients differ from patients with myasthenia gravis, in whom there are usually only small depressions of the response of the rested muscle to a single stimulus. During repetitive stimulation, there is usually a decrease in the response at high rates as well as at low rates of stimulation. The electromyographic characteristics of the defect of neuromuscular transmission seen in the myasthenic syndrome suggest that the pathophysiology is different from that seen in myasthenia gravis and similar to that of the neuromuscular blockade produced by magnesium ion, botulinum toxin, and neomycin, all substances known to decrease the number of ACh packages released per nerve impulse. (*Elmqvist, D., and Lambert, E. H.: Detailed Analysis of Neuromuscular Transmission in a Patient with the Myasthenic Syndrome Sometimes Associated with Bronchogenic Carcinoma, Mayo Clin. Proc.* 43: 689 (Oct.) 1968.)
